# Supplementary material for: Hexane Extract of Chloranthus japonicus Increases Adipocyte Differentiation by Acting on Wnt/β-Catenin Signaling Pathway
Source: MDPI journal article supplement (doi:10.3390/life11030241), 2021-03-15
Supplement: s1 [file s1]

Supplementary Materials

## Hexane Extract of *Chloranthus japonicus* Increases Adipocyte Differentiation by Acting on Wnt/ $\beta$ -catenin Signaling Pathway

Ui Jeong Yun <sup>1</sup>, Chu Won Nho <sup>2</sup>, Kye Won Park <sup>1,\*</sup> and Dong Kwon Yang <sup>3,\*</sup>

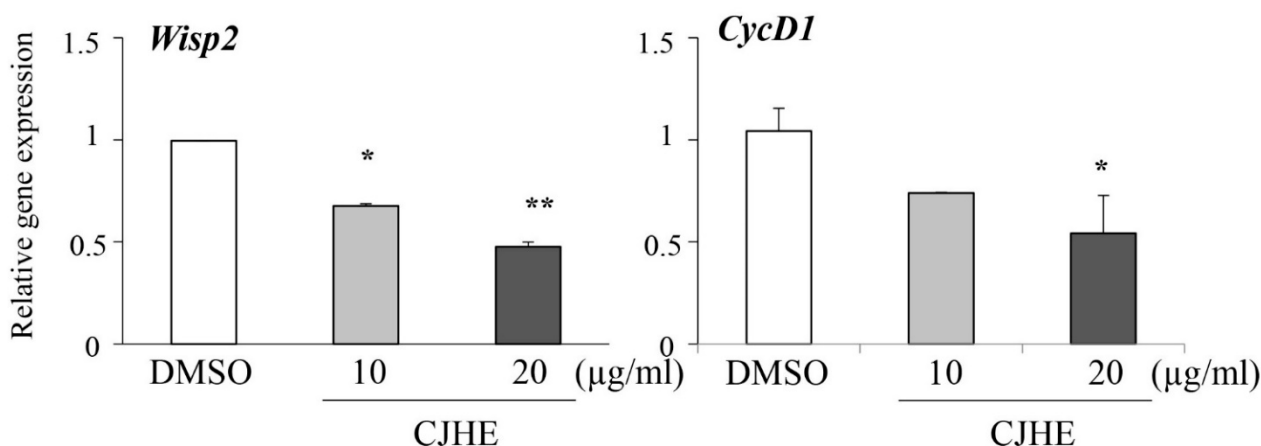

**Figure S1.** CJHE inhibits Wnt target gene expression in C3H10T1/2 cells. C3H10T1/2 cells were treated with CJHE for 24 h and the expression of Wnt target genes *Wisp2* and *CycD1* was assessed by real-time PCR. The data shown represent the mean  $\pm$  standard error of the mean (SEM). Statistical significance was determined relative to the controls by the Student's t-test (\* $p < 0.05$ ; \*\* $p < 0.001$ ).

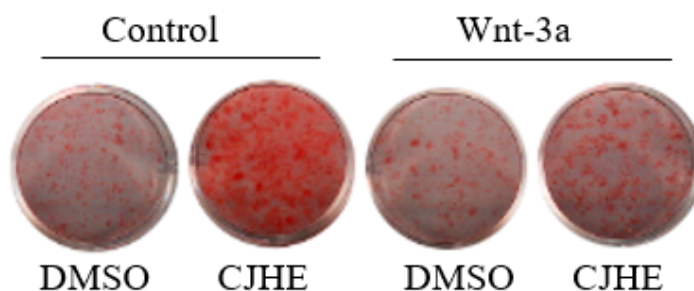

**Figure S2.** Wnt3a inhibits the effects of CJHE on adipocyte differentiation. 3T3-L1 cells were differentiated into adipocytes in the presence of BSA, control, or purified Wnt-3a and treated with 20  $\mu$ g of CJHE for 6 days. Lipid accumulation was assessed by Oil Red O staining.
